1 **Title**

2 Putting species back on the map: devising a robust method for quantifying the  
3 biodiversity impacts of land conversion

4

5 **Author names and affiliations**

6 América P. Durán<sup>1,2,3</sup>, Jonathan M.H. Green<sup>3,4</sup>, Christopher D. West<sup>4</sup>, Piero Visconti<sup>5,6</sup>, Neil  
7 D. Burgess<sup>1,2,7</sup>, Malika Virah-Sawmy<sup>8</sup>, Andrew Balmford<sup>1</sup>.

8

9 <sup>1</sup>Conservation Science Group, Department of Zoology, University of Cambridge, Cambridge,  
10 CB2 3QZ, United Kingdom

11 <sup>2</sup>UN Environment World Conservation Monitoring Centre, Huntingdon Road,  
12 Cambridge CB3 0DL, United Kingdom

13 <sup>3</sup>Luc Hoffmann Institute, c/o WWF International, Avenue du Mont Blanc, 1196 Gland,  
14 Switzerland

15 <sup>4</sup>Stockholm Environment Institute, Environment Department, University of York, York, YO10  
16 5NG, United Kingdom

17 <sup>5</sup>Institute of Zoology, Zoological Society of London, Regent's Park, London, NW1 4RY,  
18 United Kingdom

19 <sup>6</sup>Centre for Biodiversity and Environment Research, University College London, Gower  
20 Street, London, WC1E 6BT, United Kingdom

21 <sup>7</sup>Center for Macroecology, Climate and Evolution, The Natural History Museum of Denmark,  
22 Copenhagen, Denmark

23 <sup>8</sup>Geography Department, Biogeography, Humboldt University, Rudower Chaussee 16,  
24 12489 Berlin, Germany

25

26 **Corresponding author**

27 América Paz Durán (paz.duran.moya@gmail.com)

28

29 **Running title**

30 Land conversion biodiversity footprint

31

32 **ABSTRACT**

33 **Aim:** Quantifying connections between the global drivers of habitat loss and  
34 biodiversity impact is vital for decision-makers promoting responsible land-use. To  
35 that end, biodiversity impact metrics should be able to report linked trends in specific  
36 anthropogenic activities and changes in biodiversity state. However, for biodiversity,  
37 it is challenging to deliver integrated information on its multiple dimensions (i.e.  
38 species richness, endemism) and keep it practical. Here, we developed a  
39 biodiversity footprint indicator that can i) capture the status of different species  
40 groups, ii) link biodiversity impact to specific human activities, and iii) be adapted to  
41 the most applicable scale for the decision context.

42 **Location:** Cerrado Biome, Brazil

43 **Methods:** We illustrate this globally-applicable approach for the case of soybean  
44 expansion in the Brazilian Cerrado. Using species-specific habitat suitability models,  
45 we assessed the impact of soy expansion and other land uses over 2,000 species of  
46 amphibians, birds, mammals and plants for three time periods between 2000 and  
47 2014.

48 **Results:** Overall, plants suffered the greatest reduction of suitable habitat. However,  
49 among endemic and near-endemic species – which face greatest risk of global  
50 extinction from habitat conversion in the Cerrado - birds were the most affected  
51 group. While planted pastures and cropland expansion were together responsible for  
52 most of the absolute biodiversity footprint, soy expansion via direct conversion of  
53 natural vegetation had the greatest impact per unit area. The total biodiversity  
54 footprint over the period was concentrated in the southern states of Minas Gerais,

55 Goiás and Mato Grosso, but the soy footprint was proportionally higher in those  
56 northern states (such as Bahia and Piauí) which belong to the new agricultural  
57 frontier.

58 **Main conclusions:** The ability and flexibility of our approach to examine linkages  
59 between biodiversity loss and specific human activities has substantial potential to  
60 better characterise the pathways by which habitat loss drivers operate.

61

## 62 **KEYWORDS**

63 Agriculture; Brazilian savannah; Footprint indicator; Migratory species; Suitable  
64 habitat models; Soybean

65

66

67

68

69

70

71

72

73

74

75

76

77

78

79

80

81

82

83

84

85

## 86 1 | INTRODUCTION

87 Habitat loss due to land-use change is the biggest threat facing global biodiversity  
88 (Gibson et al., 2011; Joppa et al., 2016). Improved quantification of the scale of such  
89 change has been essential in supporting international initiatives for better protection  
90 and management of land (Ramsar, 1971; CBD, 2002; MEA, 2005). However, further  
91 progress is now needed in the identification of underlying drivers of land-use change  
92 and the monitoring of their associated environmental impacts to effectively articulate  
93 strategies and actions to mitigate them (Han *et al.*, 2014). This need is echoed in the  
94 recently approved Sustainable Development Goals (SDGs), particularly in Goals 12  
95 and 15 concerning the sustainable use of land and the responsible production and  
96 consumption of its derived commodities.

97 Biodiversity footprint indicators— which quantify the extent to which human  
98 activities impact upon biodiversity – enable the monitoring and reporting of impacts  
99 on biodiversity of specific human pressures (Sparks et al., 2011; Hoekstra &  
100 Wiedmann, 2014; Hill et al., 2016). Using these to quantify associations between  
101 underlying drivers, human activities and biodiversity loss not only helps track the  
102 drivers of change (e.g. consumption patterns), but can also reveal the pressures  
103 (e.g. agriculture expansion) and mechanisms (e.g. habitat conversion) through which  
104 drivers impact biodiversity (Balmford et al., 2009). Biodiversity, however, is a  
105 multidimensional concept and comprehensive measurement of changes in its state  
106 still poses challenges (Souza et al., 2015). For instance, it could be assessed in  
107 terms of species number (Newbold et al., 2015), rarity (Drever, Drever & Sleep,  
108 2012), population density (Collen et al., 2009) and functional diversity (Cadotte,  
109 Carscadden & Mirotnick, 2011). In turn, these dimensions can be variously  
110 affected by different mechanisms resulting from human activities, such as habitat

111 loss (Hanski, 2011) or fragmentation (Fahrig, 2003). An increasing understanding of  
112 how anthropogenic mechanisms affect different dimensions of biodiversity (Pearson  
113 et al., 2014; Pfeifer et al., 2017), together with a larger methodological toolkit (Ewers,  
114 Marsh & Wearn, 2010), provides an unprecedented opportunity to standardize a  
115 comprehensive biodiversity impact metric. Nevertheless, most commonly-used  
116 measuring techniques for the assessment of impacts on biodiversity still focus on  
117 change in species richness, which does not capture the whole picture. Furthermore,  
118 it is important that when assessing drivers of change, biodiversity impact metrics can  
119 translate impact estimates into scales at which information on anthropogenic  
120 activities is available and decisions are made (Ewers et al., 2010). When working  
121 with relative species richness loss, however, the spatial variability of the impact  
122 becomes difficult to scale up as the absence of species identity can lead to  
123 challenges such overrepresentation of species' ranges or misrepresentation of  
124 biodiversity priority areas (Veitch et al., 2017).

125        Approaches based on habitat suitability models offer great potential for  
126 biodiversity footprint indicators because they can integrate spatially-explicit  
127 information on anthropogenic land use and the ecology of individual species  
128 (Rondinini et al., 2011; De Baan et al., 2015). Unlike approaches that estimate  
129 potential regional or local loss of species richness (Newbold et al., 2015; Chaudhary  
130 & Kastner, 2016), models of habitat suitability retain species-specific information  
131 (Rondinini et al., 2011; de Baan, Mutel, Curran, Hellweg & Koellner et al., 2013),  
132 highly relevant given the multiple dimensions of biodiversity. Specifically, they  
133 quantify the relative change in the extent of suitable habitat (ESH) arising from land  
134 conversion, which allows estimation of a species-specific impact metric that can be  
135 associated with a particular human land-use change (Visconti et al., 2011; De Baan

136 et al., 2015). ESH is described by the intersection of a species' geographic range  
137 with its environmental preferences, measured in terms of variables such as  
138 vegetation cover, elevation and the location of water bodies and wetlands (Rondinini  
139 et al., 2011). Changes in these variables, mainly due to habitat conversion, will  
140 reduce the extent of usable habitat, affecting the persistence of local populations  
141 (Mantyka-pringle, Martin, Rhodes, 2012).

142 Previous applications of habitat suitability models have tended to assume that  
143 a species' persistence is directly proportional to the extent of remaining habitat,  
144 failing to take into account preceding habitat loss (Buchanan, Donald & Buchart,  
145 2011; van Soesbergen et al., 2017). An important consequence of this for  
146 conservation is the underestimation of the impact of current habitat loss on species  
147 that have lost a considerable proportion of their original habitat before the  
148 assessment is performed (Groves et al., 2002; see section 2.1). Some studies have  
149 addressed this limitation but have so far offered limited taxonomic coverage and  
150 used projected land-use changes rather than direct observations of habitat  
151 conversion (Visconti et al., 2016; Strassburg et al., 2017).

152 Here, using a non-linear and spatially-explicit approach we describe a  
153 biodiversity footprint indicator designed to provide information on biodiversity impact,  
154 which can be explicitly linked to specific human activities and adapted to relevant  
155 contexts and scales of decision-making. The dual nature of this metric, both footprint  
156 and indicator, allows us to quantify the biodiversity impact of specific human  
157 activities, while reporting linked trends in pressure (e.g. agriculture expansion),  
158 mechanism (e.g. land-use change) and biodiversity state. We illustrate this approach  
159 using the example of the cultivation of soybean (*Glycine max*) in the Brazilian  
160 Cerrado. We use species-specific habitat suitability models for four taxonomic

161 groups (amphibians, birds, mammals and plants) to illustrate three key benefits of  
162 the method: i) its flexibility in capturing and incorporating various levels of ecological  
163 information; ii) the scope for linking biodiversity impact to specific human activities  
164 such as agricultural commodity expansion; and iii) the capacity to aggregate the  
165 estimates across different spatial scales.

166

## 167 **2 | METHODS**

168 An important attribute we have considered during the design of the method is its  
169 applicability under a broad range of contexts. We therefore first describe how to  
170 implement the approach in general terms (section 2.1), indicating the types of data to  
171 use in each step. We then explain how this was implemented, and the specific  
172 datasets used, for investigating the impacts of soy expansion in the Brazilian  
173 Cerrado (section 2.2).

### 174 **2.1 | Method and rationale of the biodiversity footprint indicator**

175 The approach involves three steps: i) Mapping the extent of suitable habitat for each  
176 species of interest, thus including species' distributions; ii) Estimating for each  
177 species the reduction in their population persistence from the proportional loss of  
178 ESH due to land-cover conversion. Within this same step, combining the estimates  
179 across species to assess biodiversity impact, thereby considering quantity and  
180 variability of species; and iii) Linking biodiversity impact to measures of specific  
181 human activities.

182 Mapping the Extent of Suitable Habitat (ESH). We included all species whose  
183 geographic ranges intersect the study region for which habitat information is  
184 available. Every grid cell in a species' range in the region can be coded as suitable if  
185 both the following conditions are met: (i) the cell is within the geographic range of the

186 species, and (ii) the local environment is within the species' known preferences (in  
187 terms of land cover, elevation, etc.). The latter requires the harmonisation, in  
188 consultation with experts, of the categories of the available land-cover map with  
189 those used to describe species' habitat preferences. Coding of the suitability of cells  
190 should be repeated in the same way for various points in time using environmental  
191 data appropriate for each time. Each time period at which suitability is determined  
192 should be assessed against a benchmark time. For migratory species, ESH should  
193 be mapped separately for each species' resident, breeding and non-breeding  
194 ranges, based on seasonal differences in their habitat preferences. This accounts for  
195 seasonal variation in species' habitat requirements.

196 Estimating the marginal value of suitable habitat. The next step involves calculating,  
197 for each species, the remaining proportion of its initial benchmark ESH within the  
198 study area at each subsequent point in time. Changes in ESH are then used to  
199 derive a non-linear persistence score,  $P$ , which captures the cumulative effect of  
200 habitat loss on the likelihood of the species' persistence in the study region:

$$201 \quad P = (E)^z \quad (1)$$

202 where  $E$  is the remaining proportion of the original ESH, and  $z$  is the extinction  
203 coefficient. Equation (1) is analogous (at the level of a single species; Thomas et al.,  
204 2004) to the community-level species-area curve ( $S=cA^z$ ). We propose its use here  
205 based on the conjecture that the conversion of given absolute area of suitable  
206 habitat ( $A_{loss}$  in Fig. 1) after a species has lost a small amount of its initial benchmark  
207 ESH ( $a$  in Fig. 1), is likely to reduce the probability of the species' persistence less ( $c$   
208 in Fig. 1) than if the same area of suitable habitat was lost after much of the initial  
209 ESH had already been converted ( $b$  and  $d$  in Fig. 1). As an increasing number of  
210 studies have demonstrated, historical habitat loss can have important cumulative



211 and delayed effects on biodiversity (Krauss et al., 2010; Wearn et al., 2012), and  
212 ignoring such effects by assuming, for example, a linear relationship between habitat  
213 loss and species' persistence (equivalent to a z-value of 1 in Equation 1), can result  
214 in severe underestimations of biodiversity loss.

215 In addition, distribution size (here estimated by ESH), is one key factor  
216 contributing to extinction risk and it is also closely correlated with population size  
217 (Blackburn et al., 1997; Harris & Pimm, 2008). Therefore, reduction in species  
218 distribution is expected to affect populations' persistence (IUCN, 2001). Here we  
219 used proportion of ESH (and not the absolute area), as this allows assessing impact  
220 across species in a standardized way while accounting for quantity and variability of  
221 species. Since the initial benchmark ESH reflects the historical distribution size  
222 (when probability of persistence was 1; see below for more details), the proportional  
223 area loss declines at the same rate that absolute area loss relative to the  
224 benchmark. Consequently, species with restricted ranges will move faster to the left  
225 along the curve as the loss of one unit of absolute area means a higher proportional  
226 loss than for a widespread species. It is worth noting, however, that further work is  
227 required to establish empirically how the absolute and proportional area losses of  
228 individual species are related to probability of persistence. As yet, there is no  
229 standard method for such a calculation.

230

231

232

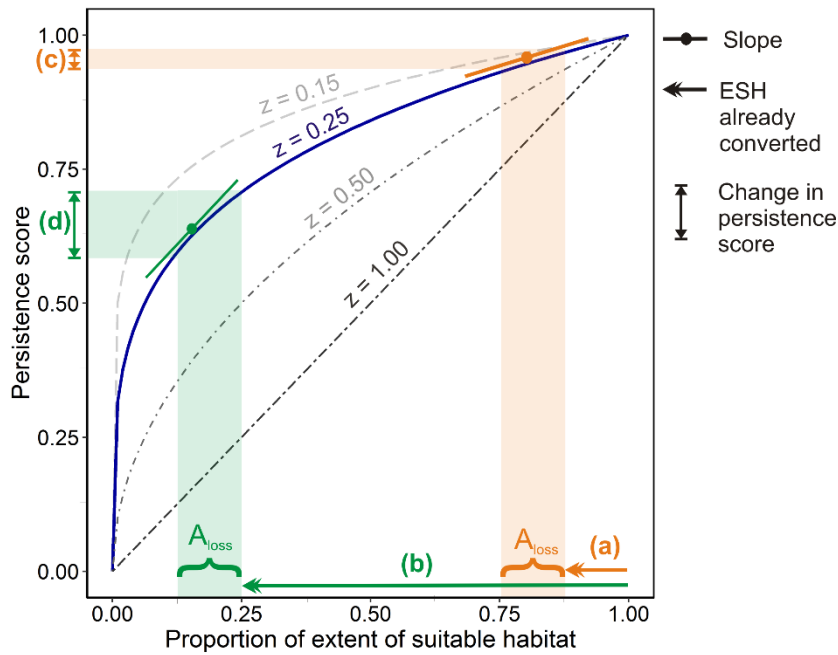

233

234

**Figure 1.** Relationship between remaining extent of suitable habitat and

235

species' persistence score,  $P$ , upon which the biodiversity footprint is based. If this

236

relationship follows a power law (with  $0 < z < 1$ ) the loss of a given area of suitable

237

habitat ( $A_{\text{loss}}$ ), when only a small proportion (a) of the original habitat has been lost

238

previously, has a smaller impact (c) on score  $P$  than losing the same area when a

239

much larger proportion (b) has already been lost (d). The size of this difference

240

depends on the extinction coefficient  $z$ , which may well vary across taxa and regions.

241

242

Once  $P$  has been estimated for two or more time points, the effect of

243

intervening habitat loss on a species' likelihood of persistence within the study area

244

can be calculated as  $\Delta P$ , the corresponding difference in  $P$ -values:

245

$$\Delta P = [(E_{t_0})^z - (E_{t_1})^z] \quad (2)$$

246

where  $E_{t_0}$  and  $E_{t_1}$  are the remaining proportions of ESH at  $t_0$  and  $t_1$ , respectively.

247 For migratory species, an overall  $\Delta P_{mig}$  score should be calculated from  $\Delta P$   
248 scores derived separately for the species' breeding and non-breeding ESH. In order  
249 to estimate the total change in a migratory species' persistence score, a  
250 multiplicative effect can be assumed, as previously suggested by empirical  
251 (Lockwood, 2004) and theoretical studies (Iwamura et al., 2013):

$$252 \quad \Delta P_{mig} = P_{b,t0} * P_{nb,t0} - P_{b,t1} * P_{nb,t1} \quad (3)$$

253 where  $P_b$  and  $P_{nb}$  are the persistence scores within the breeding and non-breeding  
254 ranges, respectively. This approach accounts for an interactive effect between  
255 populations' likelihood of persistence along the migratory movements - an important  
256 effect to consider in biodiversity impact quantifications (see Appendix S1 and Fig.  
257 S1.1 in Supporting Information for further discussion of the implications of this  
258 approach).

259 If there is interest in estimating global-level impacts but the study region itself  
260 is not global, each species'  $\Delta P$ -values should be weighted by the proportion of its  
261 global geographic range falling within the study region. Other ways of weighting  
262 different species – to reflect their ecological or evolutionary significance, for example  
263 – can also be employed at this stage (see Discussion). The weighted  $\Delta P$  of each  
264 species (including migratory ones) will then be assigned to individual cells to derive  
265 the marginal value of the loss of suitable habitat,  $MV$ , for each cell converted over a  
266 given time interval. Thus, for a period of time  $t_0 \rightarrow t_1$ , the marginal value of the loss of  
267 suitable habitat within cell  $j$  (belonging to a set of converted cells  $R$ ), for the weighted  
268  $\Delta P$  score of species  $k$ ,  $MV_{t_0 \rightarrow t_1, j, k}$ , can be represented as:

$$269 \quad MV_{t_0 \rightarrow t_1, j, k} = \Delta P_k \frac{w_k}{R_k} \quad (4)$$

270 where  $R$  is the total number of cells converted from suitable to unsuitable for that  
271 species in the period  $t_0 \rightarrow t_1$ , and  $w$  is the weight of species  $k$  (representing, for

272 example, the proportion of its geographic range falling within the study region). The  
273 resulting distribution maps of marginal loss values for individual species are then  
274 overlaid and values summed across species to obtain, for each cell, an aggregated  
275 biodiversity impact metric. Using maps of administrative boundaries (e.g.  
276 municipalities), the cell-level impact values can then be aggregated to give totals for  
277 administrative units of interest.

278 Linking biodiversity impact to a human pressure. The biodiversity impact scores  
279 described above can be attributed to categories of land-use conversion due to  
280 different types of human use (e.g. natural vegetation to cropland). Where more  
281 detailed spatial information on human activities is available, the impacts can be  
282 associated even more specifically with particular production systems, which in turn  
283 are related to the land-use conversion assessed above (Eq. 2).

## 284 **2.2 | Applying the method to soy expansion in the Cerrado**

285 We applied the approach outlined above to the specific case of the expansion of soy  
286 cultivation in the Cerrado over the period 2000 – 2014. Considered one of the  
287 world's most diverse savannah ecosystem, the Cerrado is severely threatened by  
288 the expansion of soybean cultivation and cattle ranching (Strassburg et al., 2017).

289 Mapping ESH within the biome. After selecting all the species in our focal taxa  
290 whose current ranges intersected the Cerrado boundary (IBGE 2004) and for which  
291 habitat information was available, we produced habitat suitability models to obtain  
292 234 ESHs for amphibians, 846 for birds and 288 for mammal species, each at 250 m  
293 x 250 m resolution (the resolution of the best available land cover maps for Brazil  
294 with which land-use change can be quantified consistently; IBGE 2015). Based on  
295 information on habitat associations and elevation limits obtained from the IUCN

296 Habitats Classification Scheme (IUCN 2017), we refined the historical geographic  
297 range (Extant, Probably Extant, Possibly Extinct, Extinct and Presence  
298 Uncertain) of each vertebrate species (BirdLife 2016, IUCN 2017) using a digital  
299 elevation model (USGS 2006) and land cover maps (IBGE 2004, 2011, 2014). The  
300 14 categories of the land-cover map were harmonised with the 74 habitat preference  
301 levels (for details see Appendix S2 and Table S2.1 in Supporting Information).

302 Multiple environmental variables define species distribution as well as a populations'  
303 response to habitat loss. Yet, data on habitat preferences and altitudinal range are  
304 the only species-specific variables that are available globally. Since this approach  
305 aims to be globally applicable we limited the illustration of ESH mapping to these two  
306 variables, although further information can be incorporated during the refinements of  
307 species ranges (see Discussion).

308 We also produced habitat suitability model maps for 648 plant species whose  
309 ranges intersect the Cerrado. In the absence of more detailed information on  
310 species' habitat requirements, we refined their geographic ranges (Martinelli &  
311 Moraes 2013) using information on vegetation types. We assumed that only those  
312 vegetation categories classified as natural by the Brazilian Institute of Geography  
313 and Statistics (IBGE) were potentially suitable for these species, while other semi-  
314 and non-natural categories were unsuitable (Table S2).

315 We applied our approach to IBGE land cover maps for the year 2000, 2010,  
316 2012 and 2014. For vertebrates, we used a map of original vegetation cover for the  
317 Cerrado as our initial benchmark (c.a. 16th century; IBGE 2004), to estimate ESH  
318 prior to large-scale cultivation for each species. For plants, the geographic range  
319 intersecting the study region was considered to delineate its original ESH.

320 Impacts of habitat loss on the Cerrado's biodiversity. For the calculation of weighted  
321 marginal values of each cell for each species (Eq. 4), we adopted a z-value of 0.25,  
322 based upon its ability to predict proportions of species becoming extinct or  
323 threatened as a result of habitat loss in several species-area analyses (Brooks &  
324 Balmford, 1996; Brooks, Pimm & Oyugy et al., 1999). Different z-values influence the  
325 effect of habitat loss on probability of persistence (Fig. 1; Eq. 2). However, our  
326 qualitative conclusions concerning the relative role of human activities on different  
327 groups of species and the spatial distribution of estimated biodiversity impacts are  
328 not strongly dependent on the choice of a particular value of z (Table S3.2 and Fig.  
329 S3.2 in Appendix 3 for the effects of plausible variation in z-coefficients). In addition,  
330 when information is available different z-values can be assigned to different  
331 biodiversity groups. Species'  $\Delta P$  values were weighted by the proportion of their  
332 global geographic range falling within the study region.

333 We also considered marginal increases due to gain of suitable cells (e.g.  
334 through reversion of converted land to natural habitat). However, reversion is  
335 currently on such a limited scale in the Cerrado that incorporating such gains had a  
336 minor impact on the results for most of the groups, and was therefore not considered  
337 in the main text (see Fig. S4.3 in Appendix S4).

338 Quantifying the biodiversity impact of soybean expansion. We used two types of  
339 maps for cumulative soy expansion from Gibbs et al. (2015) for the period 2000-  
340 2014: 1) direct expansion of soy into natural vegetation (where soy production  
341 occurred within three years of natural vegetation conversion); and 2) expansion into  
342 previously-cleared areas. Before intersecting soy-expansion maps with biodiversity  
343 impact maps, we combined the former with IBGE land-conversion maps to  
344 distinguish soy expansion from non-soy crop expansion (see Fig. S5.4 in Appendix

345 S5 in Supporting Information for details on land-conversion maps analysis). The  
346 resulting merged layer allowed us to also assess the impact of other non-crop  
347 categories such as planted pasture.

348

### 349 **3 | RESULTS**

#### 350 **3.1 | Assessing the biodiversity footprint for different species groups**

351 In order to illustrate biodiversity impact at species level we focused on five  
352 conservation flagship species in the Cerrado (WWF, 2015). For the Maned Wolf  
353 (*Chrysocyon brachyurus*), Jaguar (*Panthera onca*), Giant Armadillo (*Priodontes*  
354 *maximus*), South American Tapir (*Tapirus terrestris*) and Giant Anteater  
355 (*Myrmecophaga tridactyla*), habitat loss within the Cerrado has caused steady  
356 declines in their weighted persistence scores over the 2000-2014 period (Fig. 2a;  
357 declines of 0.006, 0.007, 0.009, 0.009, and 0.01, respectively). As the only species  
358 for which 'Arable' and 'Pasture' are considered suitable habitats (IUCN 2017), the  
359 Maned Wolf presented the smallest decline of the five species and had a markedly  
360 higher score than the other species in 2014. Major losses of natural vegetation had  
361 occurred by 2000 already, with Giant Armadillo losing 80% of its Cerrado ESH, Giant  
362 Anteater 83%, Jaguar 88% and South American Tapir 84%. While the Jaguar  
363 showed the largest reduction of its original ESH within the Cerrado, this accounts for  
364 a relatively small proportion of its global range, resulting in a smaller change in its  
365 persistence score than for other species (Fig. 2a).

366 When biodiversity impacts were aggregated by taxonomic group (Fig. 2b),  
367 plants showed the largest impact 2000-14 ( $0.042 \pm 0.002$ ; mean  $\pm$  standard error),  
368 then mammals ( $0.015 \pm 0.007$ ), amphibians ( $0.012 \pm 0.008$ ) and birds ( $0.0079 \pm$   
369  $0.003$ ). In the 2012-2014 period alone, plants lost on average 9.1% of their original

370 ESH within the Cerrado ( $0.30 \text{ y}^{-1}$ ), compared to the 7.1% lost over the 2000-2012  
371 period ( $0.07 \text{ y}^{-1}$ ). This resulted in a sharper mean decline of plants' weighted  
372 persistence score ( $0.025 \pm 0.0032$ ;  $0.047/\text{y}^{-1}$ ), relative to the prior twelve years  
373 ( $0.017 \pm 0.0013$ ;  $0.006/\text{y}^{-1}$ ).

374 Focusing on birds, we also assessed how impacts varied across species of  
375 different conservation status (Fig. 2c). Declines in persistence scores were  
376 consistently greater among species in higher extinction risk categories (Fig. 2c).  
377 Among Critically Endangered (CR;  $0.034 \pm 0.015$ ) and Endangered (EN;  $0.027 \pm$   
378  $0.007$ ) species, the mean persistence score decreased more between 2000 and  
379 2014 than among Vulnerable (VU;  $0.014 \pm 0.002$ ), Near Threatened (NT;  $0.013 \pm$   
380  $0.002$ ) and Least Concern (LC;  $0.006 \pm 0.0004$ ) species.

381 We also assessed endemic and near-endemic species, for which we included  
382 those species with more than 70% of their global range falling within the Cerrado.  
383 Overall, compared to more widely distributed species and species groups (Fig.  
384 2a,b,c), endemics presented a much more severe decline in their persistence score  
385 (Fig. 2d,e,f), representing an acute threat to their global persistence.



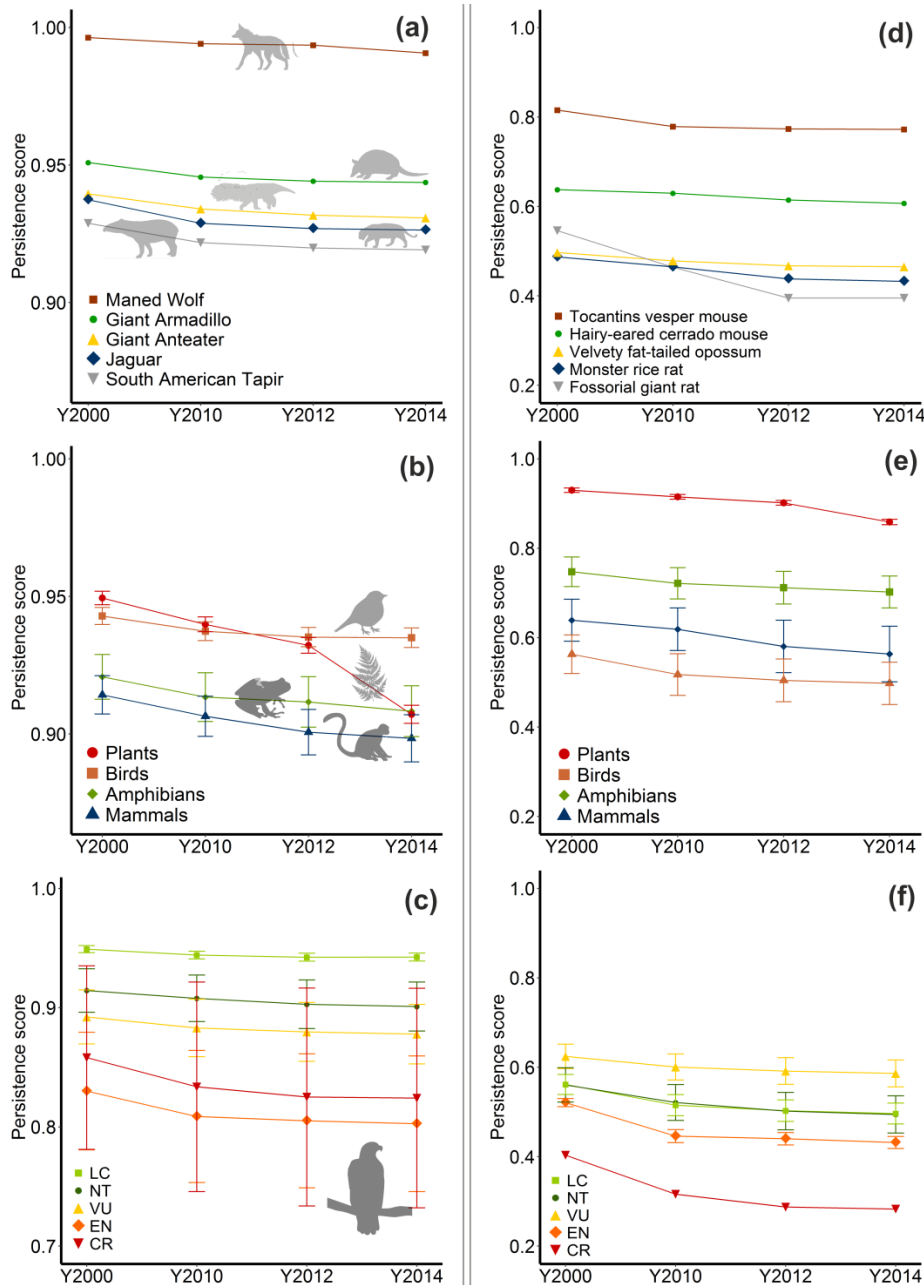

386

387 **Figure 2.** Changes in persistence score due to land conversion between 2000 and  
 388 2014, calculated for different levels and elements of biodiversity: (a) at species level,  
 389 showing results for five flagship species; (b) for taxonomic groups, showing mean  
 390 persistence scores for four vertebrate taxa; (c) grouped by IUCN Red List status,  
 391 showing mean persistence scores for birds; (d) at species level, showing results for  
 392 five endemic and near-endemic mammal species; (e) for taxonomic groups, showing  
 393 mean persistence scores for endemic and near-endemic species only; and (f)  
 394 grouped by IUCN Red List status, showing mean persistence scores for endemic  
 395 and near-endemic bird species only. Upper and lower bars show one standard error.

### 396 **3.2 | Links between biodiversity footprint and commodity production**

397 For 2000-2014, our results revealed that conversion to grassland, whilst comprising  
398 45% of the area of habitat converted, was responsible for just 14% of the total  
399 biodiversity footprint of all land conversion in the region (Fig. 3). In contrast, planted  
400 pastures, crops other than soybean and mosaic crops were together responsible for  
401 43% of the habitat conversion but 67% of the biodiversity footprint (Fig. 3). Soybean  
402 expansion into previously converted habitat was responsible for 3% of the habitat  
403 conversion but 5% of the total biodiversity footprint. Lastly, whilst direct expansion of  
404 soy into natural vegetation was responsible for only 0.15% of the total habitat  
405 converted, it accounted for 0.8% of the biodiversity footprint.

406 We also explored the relative footprint per unit area, which can reveal land  
407 use transitions with disproportionate impacts on biodiversity. To this end, we  
408 calculated the ratio of proportional contribution to the total biodiversity footprint to  
409 proportion of area converted (Fig. 3): higher ratios indicate land-use conversions with  
410 disproportionately high biodiversity footprints. We found that, although soy expansion  
411 through direct conversion of natural habitat had the smallest areal footprint, it had the  
412 highest impact on biodiversity per unit area (5.3). This indicates that soy expansion  
413 through direct conversion has altered a disproportional amount of ESH relative to the  
414 total footprint land used. Further disaggregating this by taxa showed that mammals  
415 were the most affected group (8.3), followed by birds (7.9), amphibians (2.6) and  
416 plants (1.6) (see Fig. S6.5 in Supporting Information).

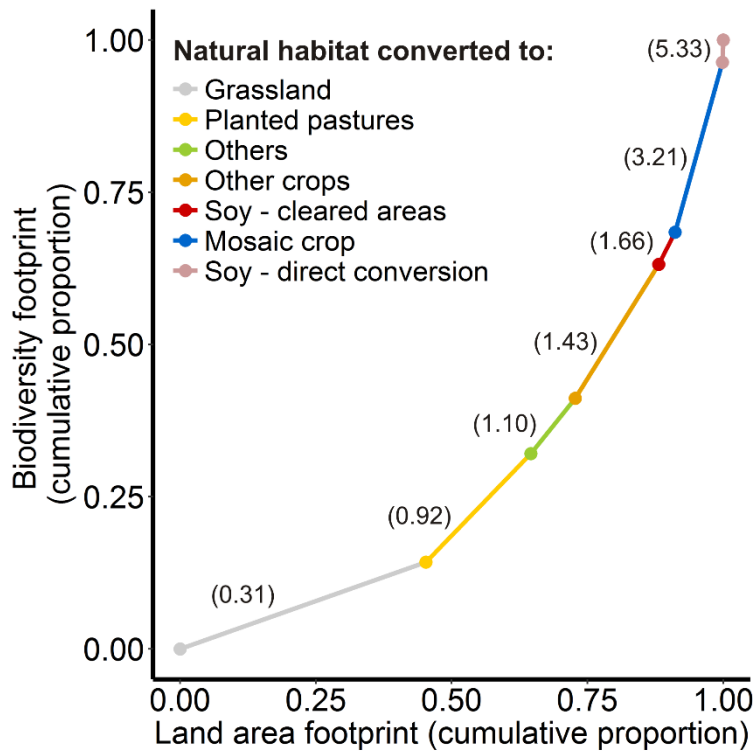

417

418 **Figure 3.** The proportional contribution of different land-use conversions to the total  
419 biodiversity footprint 2000-14 in the Cerrado including four taxonomic groups, plotted  
420 against the proportion of the total land area footprint of each land-use change. Land-  
421 use conversions are plotted in order of increasing ratio of proportional contribution to  
422 change in persistence score: proportional contribution to loss of ESH (with the ratios  
423 shown in parentheses). Higher ratios thus indicate land-use conversions with  
424 disproportionately high impacts on our biodiversity footprint metric given the area  
425 converted. We aggregated IBGE land-use categories as follows: other crop (than  
426 soybean), planted pasture, mosaic (mosaic-forest, mosaic-crop and mosaic-  
427 shrubland), grassland, and other.

428

### 429 **3.4 | Adapting biodiversity footprint to scales of decision-making**

430 We designed our footprint indicator so it can be aggregated at different scales, while  
431 still capturing ecological impacts of change. Each cell's score contributes  
432 proportionally to the footprint (Eq. 4), so cell values can be summed across any area  
433 of interest (e.g. a municipality) to reflect that area's contribution to the overall

434 footprint. In the Cerrado, aggregating the biodiversity footprint indicator across  
435 municipalities and states for the 2000-14 time period revealed distinct insights at  
436 different scales (Fig. 4a-c). It is possible to identify municipalities with relatively high  
437 biodiversity impact within states of relatively low footprint, revealing local-scale  
438 impacts that are diluted at coarser resolution. For example, the municipalities of  
439 Mateiros (with a score of 0.54) and Jaborandi (0.32), fell in two states with overall  
440 low values: the state of Tocantins (1.36) and Bahía (0.99), respectively. These two  
441 states are part of the 'MATOPIBA' agricultural frontier and have undergone more  
442 rapid habitat conversion since 2000 than other states (Fig. S7.6 in Supplementary  
443 Information). Their relatively low species richness (Fig. S8.7b), however, results in  
444 lower overall impact scores than in more biodiversity-rich states (Fig. S8.7b; Fig.  
445 S9.8). Nevertheless our method singles-out areas that may be of particular  
446 conservation concern in these states. Our method also allowed us to disentangle the  
447 state-level biodiversity footprint into different types of land conversion (Fig. 4d). In  
448 two states that underwent particularly extensive habitat clearance prior to 2000, Mato  
449 Grosso and Goiás, subsequent soy expansion was largely into already-cleared areas  
450 (Fig. 4d), and so had a relatively low footprint. In contrast, in Bahía and Piauí, two  
451 states that have undergone extensive habitat clearance within the new agricultural  
452 frontier, recent soy expansion is associated with a greater impact on biodiversity.

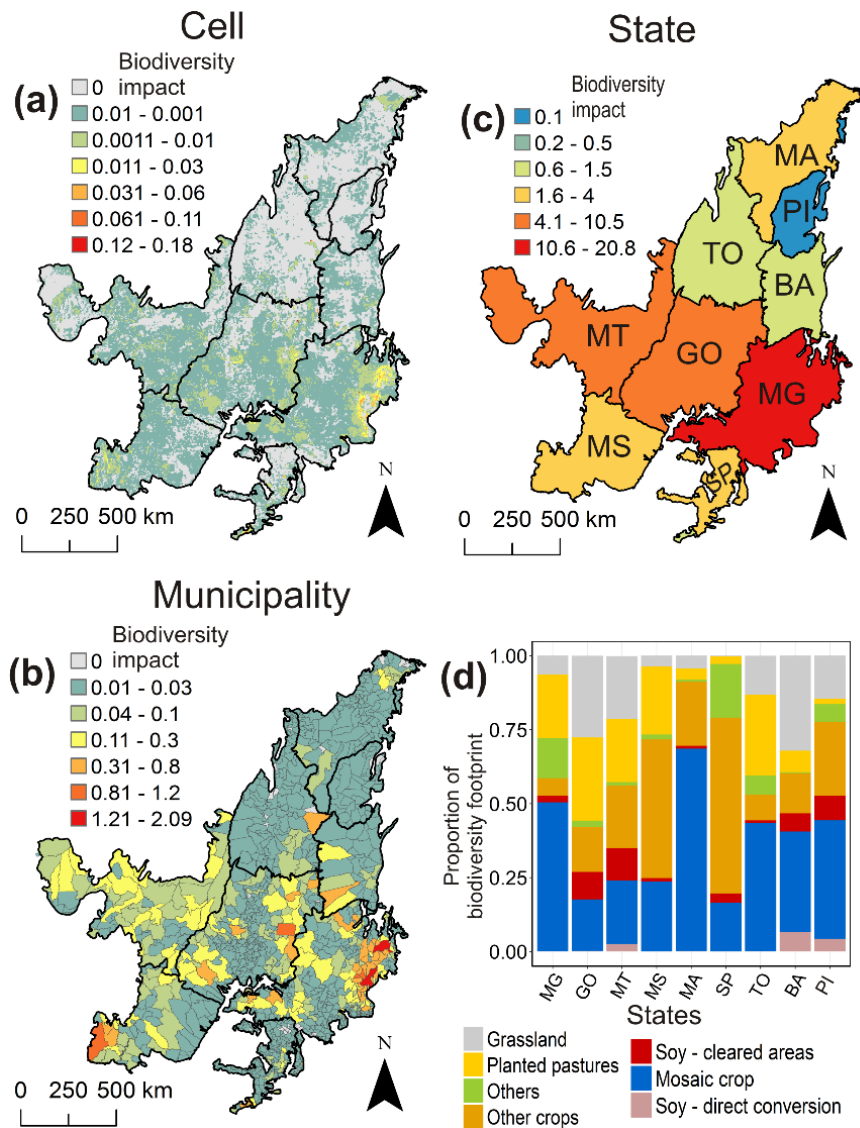

453

454 **Figure 4.** Distribution of biodiversity footprint scores due to loss of ESH 2000-14,  
 455 when data are aggregated for all species at three different spatial scales and for  
 456 different land/use changes. (a) Cell (0.0625 km<sup>2</sup>); (b) Municipality; (c) State; and (d)  
 457 proportional contribution of different land-use conversions to the total biodiversity  
 458 footprint 2000-14 at state level. [MG: Minas Gerais; GO: Goiás; MT: Mato Grosso;  
 459 MS: Mato Grosso do Sul; MA: Maranhão; SP: São Paulo; TO: Tocantins; BA: Bahia;  
 460 PI: Piauí].

461

462

463

## 464 **4 | DISCUSSION**

465 Three criteria shaped the design of our biodiversity indicator; it should: i) be able to  
466 capture the status of different components of biodiversity, while including aspects  
467 such as the distribution, quantity and variability of species, ii) allow biodiversity  
468 impacts to be linked to specific human activities; and iii) be scalable to inform  
469 decision-making at different levels. Below we highlight strengths and limitations of  
470 our approach in relation to these criteria.

### 471 *4.1 Capturing the status of different components of biodiversity.*

472 By combining information on land cover change, individual species' distributions and  
473 habitat preferences this method identifies which biodiversity elements are most  
474 affected and where the greatest impacts have occurred (Fig. 2; Fig. 4). Working at  
475 the level of species allows features of the ecology of species (such as their habitat  
476 specificity, endemism or migratory movements) to be incorporated, thereby  
477 considering species' distribution and variability (Visconti et al., 2016). Making such  
478 information spatially explicit, allows hotspots of biodiversity risk to be identified, and  
479 provides information on the quantity of species that are vulnerable (Visconti et al.,  
480 2011).

481 When information on habitat preferences is unavailable, as it was here for plants,  
482 assumptions on habitat requirements need to be made. If such assumptions are  
483 generous – such as that species can occur in a wide range of land covers including  
484 anthropogenic ones - there is higher chance of incurring errors of commission  
485 (assuming a species occurs where it does not) and hence of underestimating  
486 species' risk of local extinction (Rondinini, Stuart & Boitani, 2005). In contrast, more  
487 conservative assumptions are prone to errors of omission (incorrectly assuming that  
488 a species is absent) and thus of overestimating impact (Rondinini et al., 2005).

489 Under the precautionary principle, widely adopted in assessing biodiversity risk  
490 (Myers 1993; Dickson & Cooney, 2005), conservative assumptions might be more  
491 appropriate.

492 As our study area covers a fraction of the global population of many species,  
493 we weighted species' persistence scores by the proportion of their geographic range  
494 that intersects the Cerrado. This assigns more weight to impacts on those species  
495 restricted to the biome, but places less emphasis on the local loss of species with a  
496 small fraction of their range intersecting the Cerrado. While such losses might have  
497 limited global conservation consequences, they could nonetheless have significant  
498 ecological or cultural effects. For instance the Jaguar experienced only a small  
499 change in its weighted persistence score as a result of habitat loss in the Cerrado; a  
500 non-weighted score shows much more extensive decline (a local decline to 0.51  
501 versus a global decline to 0.92 by 2014; Fig. S10.9a). To represent losses of  
502 culturally- or ecologically- important species, it would also be possible to apply  
503 additional weightings when summing  $\Delta P$  values across species, which could reflect  
504 variation in ecological or cultural significance.

505 While the wide availability of the data used here makes our method practical  
506 and accessible, we acknowledge that the variables we use cannot fully capture the  
507 ecological complexity to which species respond. For instance, habitat fragmentation  
508 and isolation can be important determinants of species occurrence (Ewers et al.,  
509 2010) and ignoring such landscape-level information can add further error into  
510 species' distribution mapping (i.e. omission and commission error, see above for  
511 further discussion). Even though information on how species respond to  
512 fragmentation and edge-effects is currently absent from the IUCN Red List, recent  
513 studies have provided insight in how best to model this. By combining suitable

514 habitat modelling techniques and spatial layers, a continuous representation of  
515 individual species' responses to fragmentation and edge-effects can be calculated  
516 (Ewers et al., 2010; Pfeifer et al., 2017). Thus, combining these layers with a  
517 biodiversity footprint metric, such as the one proposed in this paper, can help us  
518 understand how biodiversity responds to changes in both landscape composition  
519 and structure. Such an advancement will provide key insights into land management  
520 and biodiversity conservation.

#### 521 **4.2 | Linking biodiversity impact to specific human activities**

522 Our method disentangles, at different spatial scales, the effects of human activities  
523 bringing about habitat loss (Fig. 3). This is essential for then tracking the pathway  
524 through which underlying drivers of habitat loss operate (Moran & Kanemoto, 2017).  
525 In this study we focused on soy production as the direct human activity affecting  
526 habitat loss, which in turn can be influenced by remote drivers such as consumption  
527 patterns (de Ruiter et al., 2017), production shortages (Godfray et al., 2010) and  
528 population growth (Dasgupta & Ehrlich, 2013). As well as remote drivers, other set of  
529 indirect channels can also influence the effects of a human activity on habitat loss.  
530 This can be through land use displacement, a widely recognized mechanism  
531 underlying indirect land use change (Lambin & Meyfroidt, 2011). Also, via the ability  
532 to influence regional land markets, therefore affecting deforestation decisions  
533 indirectly (Richards, 2015). Similar to previous studies (Richards, 2015), our  
534 estimation of soy indirect impact (through the displacement of cattle ranches into  
535 natural vegetation (see Appendix 11 and Fig.11.10 in Supplementary Information)),  
536 also suggested a limited role of land use displacement in the overall impact. Thus,  
537 incorporating multiple techniques to capture direct and indirect drivers, while  
538 encompassing a broader time frame that allows assessing historical land-conversion



539 trends, will certainly better capture the full responsibility of assessed human  
540 activities, such as the case of soy in the Cerrado.

### 541 **4.3 | Aggregating biodiversity impact at different spatial scales**

542 Developing tools that capture and translate the ecological scale of the problem to  
543 scales where decisions are made has been suggested as a key solution to improve  
544 evidence impact (Guerrero, McAllister, Corcoran & Wilson, 2013). The results  
545 presented here suggest that our proposed method meets these requirements, by  
546 capturing relevant ecological information such as species richness, mean historical  
547 habitat losses and endemism (Fig. S8.7), which can be adapted to different scales of  
548 decision-making. Metrics of impact that are adaptable to different scales of threat  
549 information are also likely to be useful in evaluating causal connections between  
550 biodiversity impact and human activities (see section 4.4 for more discussion on this  
551 regard). Another relevant aspect is the sensitivity of the aggregated metric to its key  
552 parameters (Eq. 2). Using different z-values we observed only minor changes in the  
553 aggregated biodiversity footprint and the distribution of biodiversity risk hotspots (Fig.  
554 S3.2e,f). As z increases, the decline of species' persistence score increases for a  
555 given loss of ESH (Fig. 1). Hence at higher z, areas (e.g. states) that harbour  
556 species with high historical ESH loss such as Mato Grosso (MT) and Mato Grosso  
557 do Sul (MS) (Fig. S8.7c), have a higher increment in their aggregate biodiversity  
558 footprint than do areas with less historical loss of ESH.

### 559 **4.4 | Implications of our method for the Cerrado**

560 The Cerrado example illustrates how our approach can quantify human activities  
561 driving land-use change and monitor their biodiversity impacts. Although these  
562 activities are well known to be in the Cerrado soy and livestock production, there  
563 remains a clear need to map the underlying trade system of both commodities

564 (Garrett, Lambin & Naylor, 2013). Brazil is now the second-largest soy producer  
565 worldwide, and in 2013/2014 about half (52%) of soybeans produced in Brazil came  
566 from the Cerrado (INPUT, 2016). A better understanding of the highly complex  
567 production-to-consumption system, comprising large numbers of trade actors (e.g.  
568 producers, manufacturers, exporters), is an ongoing and challenging effort (Godar,  
569 Suavet, Gardner, Dawkins, & Meyfroidt, 2016). By linking spatially-explicit  
570 biodiversity risk hotspots with information on soy and livestock production and trade  
571 our approach provides a platform to start disentangling the relative roles of different  
572 actors.

573

## 574 REFERENCES

- 575 De Baan, L., Mutel, C. L., Curran, M., Hellweg, S., & Koellner, T. (2013). Land use in life  
576 cycle assessment: global characterization factors based on regional and global  
577 potential species extinction. *Environmental science & Technology*, *47*, 9281-9290.
- 578 de Baan, L., Curran, M., Rondinini, C., Visconti, P., Hellweg, S., & Koellner, T. (2015). High-  
579 resolution assessment of land use impacts on biodiversity in life cycle assessment  
580 using species habitat suitability models. *Environmental science & Technology*, *49*,  
581 2237-2244.
- 582 Balmford, A., Carey, P., Kapos, V., Manica, A., Rodrigues, A. S., Scharlemann, J. P., &  
583 Green, R. E. (2009). Capturing the many dimensions of threat: comment on Salafsky et  
584 al. *Conservation Biology*, *23*, 482-487.
- 585 BirdLife International and NatureServe (2016) Bird species distribution maps of the world.  
586 BirdLife International, Cambridge, UK and NatureServe, Arlington, USA.
- 587 Blackburn, T.M., Gaston, K.J., Quinn, R.M., Arnold, H. & Gregory, R.D. (1997) Of mice and  
588 wrens: the relation between abundance and geographic range size in British mammals  
589 and birds. *Philosophical Transactions of the Royal Society of London B: Biological*  
590 *Sciences*, *352*, 419-427.
- 591 Brooks, T., & Balmford, A. (1996). Atlantic forest extinctions. *Nature*, *380*, 115.
- 592 Brooks, T. M., Pimm, S. L., & Oyugi, J. O. (1999). Time lag between deforestation and bird  
593 extinction in tropical forest fragments. *Conservation Biology*, *13*, 1140-1150.
- 594 Buchanan, G. M., Donald, P. F., & Butchart, S. H. (2011). Identifying priority areas for  
595 conservation: a global assessment for forest-dependent birds. *PloS one*, *6*, e29080.
- 596 CBD (2002) Rio+20 United Nations Conference on Sustainable Development.
- 597 Cadotte, M. W., Carscadden, K., & Mirotnick, N. (2011). Beyond species: functional

- 598 diversity and the maintenance of ecological processes and services. *Journal of Applied*  
599 *Ecology*, 48, 1079-1087.
- 600 Chaudhary, A., & Kastner, T. (2016). Land use biodiversity impacts embodied in  
601 international food trade. *Global Environmental Change*, 38, 195-204.
- 602 Collen, B., Loh, J., Whitmee, S., McRAE, L., Amin, R., & Baillie, J. E. (2009). Monitoring  
603 change in vertebrate abundance: the Living Planet Index. *Conservation Biology*, 23,  
604 317-327.
- 605 Dasgupta, P. S., & Ehrlich, P. R. (2013). Pervasive externalities at the population,  
606 consumption, and environment nexus. *Science*, 340(6130), 324-328.
- 607 Dickson, B. & Cooney, R. (2005). Biodiversity and the precautionary principle : risk and  
608 uncertainty in conservation and sustainable use. London, Earthscan.
- 609 Espírito-Santo, M. M., Leite, M. E., Silva, J. O., Barbosa, R. S., Rocha, A. M., Anaya, F. C.,  
610 & Dupin, M. G. (2016). Understanding patterns of land-cover change in the Brazilian  
611 Cerrado from 2000 to 2015. *Philosophical Transactions of the Royal Society B*, 371,  
612 20150435.
- 613 Ewers, R. M., Marsh, C. J., & Wearn, O. R. (2010). Making statistics biologically relevant in  
614 fragmented landscapes. *Trends in Ecology & Evolution*, 25, 699-704.
- 615 Fahrig, L. (2003). Effects of habitat fragmentation on biodiversity. *Annual Review of Ecology,*  
616 *Evolution, and Systematics*, 34, 487-515.
- 617 Garrett, R. D., Lambin, E. F., & Naylor, R. L. (2013). Land institutions and supply chain  
618 configurations as determinants of soybean planted area and yields in Brazil. *Land Use*  
619 *Policy*, 31, 385-396.
- 620 Gibbs, H. K., Rausch, L., Munger, J., Schelly, I., Morton, D. C., Noojipady, P., ...Walker, N.  
621 F. (2015). Brazil's soy moratorium. *Science*, 347, 377-378.
- 622 Gibson, L., Lee, T. M., Koh, L. P., Brook, B. W., Gardner, T. A., Barlow, J., ... Sodhi, N. S.  
623 (2011). Primary forests are irreplaceable for sustaining tropical  
624 biodiversity. *Nature*, 478, 378.
- 625 Godar, J., Suavet, C., Gardner, T. A., Dawkins, E., & Meyfroidt, P. (2016). Balancing detail  
626 and scale in assessing transparency to improve the governance of agricultural  
627 commodity supply chains. *Environmental Research Letters*, 11, 035015.
- 628 Godfray, H. C. J., Beddington, J. R., Crute, I. R., Haddad, L., Lawrence, D., Muir, J. F., ... &  
629 Toulmin, C. (2010). Food security: the challenge of feeding 9 billion  
630 people. *Science*, 327, 812-818.
- 631 Groves, C. R., Jensen, D. B., Valutis, L. L., Redford, K. H., Shaffer, M. L., Scott, J. M., ...  
632 Anderson, M. G. (2002). Planning for Biodiversity Conservation: Putting Conservation  
633 Science into Practice: A seven-step framework for developing regional plans to  
634 conserve biological diversity, based upon principles of conservation biology and  
635 ecology, is being used extensively by the nature conservancy to identify priority areas  
636 for conservation. *AIBS Bulletin*, 52, 499-512.
- 637 Guerrero, A. M., McAllister, R. Y. A. N., Corcoran, J., & Wilson, K. A. (2013). Scale  
638 mismatches, conservation planning, and the value of social-network  
639 analyses. *Conservation Biology*, 27, 35-44.

- 640 Han, X., Smyth, R. L., Young, B. E., Brooks, T. M., de Lozada, A. S., Bubb, P., ... & Turner,  
641 W. R. (2014). A biodiversity indicators dashboard: Addressing challenges to monitoring  
642 progress towards the Aichi biodiversity targets using disaggregated global data. *PloS*  
643 *one*, 9, e112046.
- 644 Hanski, I. (2011). Habitat loss, the dynamics of biodiversity, and a perspective on  
645 conservation. *AMBIO: A Journal of the Human Environment*, 40, 248-255.
- 646 Harris, G., Pimm, S.L. (2008) Range size and extinction risk in forest birds. *Conservation*  
647 *Biology*, 22, 163–171.
- 648 Hill, S. L., Harfoot, M., Purvis, A., Purves, D. W., Collen, B., Newbold, T., .... Mace, G. M.  
649 (2016). Reconciling biodiversity indicators to guide understanding and  
650 action. *Conservation Letters*, 9, 405-412.
- 651 Hoekstra, A. Y., & Wiedmann, T. O. (2014). Humanity's unsustainable environmental  
652 footprint. *Science*, 344, 1114-1117.
- 653 INPUT (2016) The expansion of soybean production in the Cerrado. Available:  
654 [http://www.inputbrasil.org/wp-content/uploads/2016/11/The-expansion-of-soybean-](http://www.inputbrasil.org/wp-content/uploads/2016/11/The-expansion-of-soybean-production-in-the-Cerrado_Agroicone_INPUT.pdf)  
655 [production-in-the-Cerrado\\_Agroicone\\_INPUT.pdf](http://www.inputbrasil.org/wp-content/uploads/2016/11/The-expansion-of-soybean-production-in-the-Cerrado_Agroicone_INPUT.pdf). Accessed: January 2018.
- 656 Instituto Brasileiro de Geografia e Estatística (IBGE). 2004. Borders of Brazilian biomes.  
657 <http://maps.lapig.iesa.ufg.br/lapig.html>. Accessed August 2016.
- 658 Instituto Brasileiro de Geografia e Estatística (IBGE). 2014. COBERTURA E USO DA  
659 TERRA DO BRASIL 2000, 2010, 2012, 2014.  
660 [ftp://geoftp.ibge.gov.br/informacoes\\_ambientais/cobertura\\_e\\_uso\\_da\\_terra/mudancas/vet](ftp://geoftp.ibge.gov.br/informacoes_ambientais/cobertura_e_uso_da_terra/mudancas/vetores/)  
661 [ores/](ftp://geoftp.ibge.gov.br/informacoes_ambientais/cobertura_e_uso_da_terra/mudancas/vetores/). Accessed: August 2016.
- 662 Instituto Brasileiro de Geografia e Estatística (IBGE). 2015. Mudança na Cobertura e Uso da  
663 Terra 2000, 2010 and 2012. [https://biblioteca.ibge.gov.br/index.php/biblioteca-](https://biblioteca.ibge.gov.br/index.php/biblioteca-catalogo?view=detalhes&id=294724)  
664 [catalogo?view=detalhes&id=294724](https://biblioteca.ibge.gov.br/index.php/biblioteca-catalogo?view=detalhes&id=294724). Accessed: August 2016
- 665 IUCN (2001) IUCN Red List categories and criteria Version 3.1. Gland, Switzerland and  
666 Cambridge, UK: IUCN Species Survival Commission
- 667 IUCN 2017. IUCN Red List of Threatened Species. Version 2017-1 [www.iucnredlist.org](http://www.iucnredlist.org)
- 668 Iwamura, T., Possingham, H. P., Chadès, I., Minton, C., Murray, N. J., Rogers, D. I., ...  
669 Fuller, R. A. (2013). Migratory connectivity magnifies the consequences of habitat loss  
670 from sea-level rise for shorebird populations. *Proceedings of the Royal Society of*  
671 *London B: Biological Sciences*, 280, 20130325.
- 672 Joppa, L. N., O'Connor, B., Visconti, P., Smith, C., Geldmann, J., Hoffmann, M., ... &  
673 Ahmed, S. E. (2016). Filling in biodiversity threat gaps. *Science*, 352, 416-418.
- 674 Krauss, J., Bommarco, R., Guardiola, M., Heikkinen, R. K., Helm, A., Kuussaari, M., ... &  
675 Pöyry, J. (2010). Habitat fragmentation causes immediate and time-delayed biodiversity  
676 loss at different trophic levels. *Ecology letters*, 13, 597-605.
- 677 Lambin, E. F., & Meyfroidt, P. (2011). Global land use change, economic globalization, and  
678 the looming land scarcity. *Proceedings of the National Academy of Sciences*, 108,  
679 3465-3472.

- 680 Lockwood, J.A. (2004). *Locust: the devastating rise and mysterious disappearance of the*  
681 *insect that shaped the American frontier*. USA, Basic Books.
- 682 Mantyka-pringle, C. S., Martin, T. G., & Rhodes, J. R. (2012). Interactions between climate  
683 and habitat loss effects on biodiversity: a systematic review and meta-analysis. *Global*  
684 *Change Biology*, 18, 1239-1252.
- 685 Martinelli, G. and Moraes, M.A. (2013). *Livro vermelho da flora do Brasil*. Brazil, IUCN.
- 686 Moran, D., & Kanemoto, K. (2017). Identifying species threat hotspots from global supply  
687 chains. *Nature Ecology & Evolution*, 1, 0023.
- 688 Myers, N. (1993). Biodiversity and the precautionary principle. *Ambio*, 74-79.
- 689 Newbold, T., Hudson, L. N., Hill, S. L., Contu, S., Gray, C.L., Scharlemann, J.P.W.,  
690 ...Purvis, A. (2015). Global effects of land use on local terrestrial  
691 biodiversity. *Nature*, 520, 45.
- 692 Pearson, R. G., Stanton, J. C., Shoemaker, K. T., Aiello-Lammens, M. E., Ersts, P. J.,  
693 Horning, N., ... Akçakaya, H. R. (2014). Life history and spatial traits predict extinction  
694 risk due to climate change. *Nature Climate Change*, 4, 217.
- 695 Pfeifer, M., Lefebvre, V., Peres, C. A., Banks-Leite, C., Wearn, O. R., Marsh, C. J., ...  
696 Cisneros, L. (2017). Creation of forest edges has a global impact on forest  
697 vertebrates. *Nature*, 551, 187.
- 698 Rio+20 United Nations Conference on Sustainable Development. Available:  
699 <http://www.uncsd2012.org/>. Accessed July 2017
- 700 Richards, P. (2015). What drives indirect land use change? How Brazil's agriculture sector  
701 influences frontier deforestation. *Annals of the Association of American*  
702 *Geographers*, 105, 1026-1040.
- 703 Rondinini, C., Di Marco, M., Chiozza, F., Santulli, G., Baisero, D., Visconti, P., ... Amori, G.  
704 (2011). Global habitat suitability models of terrestrial mammals. *Philosophical*  
705 *Transactions of the Royal Society B: Biological Sciences*, 366, 2633-2641.
- 706 Rondinini, C., Stuart, S., & Boitani, L. (2005). Habitat suitability models and the shortfall in  
707 conservation planning for African vertebrates. *Conservation Biology*, 19, 1488-1497.
- 708 Drever, R. C., Drever, M. C., & Sleep, D. J.H. (2012). Understanding rarity: A review of  
709 recent conceptual advances and implications for conservation of rare species. *The*  
710 *Forestry Chronicle*, 88, 165-175.
- 711 de Ruiter, H., Macdiarmid, J. I., Matthews, R. B., Kastner, T., Lynd, L. R., & Smith, P. (2017).  
712 Total global agricultural land footprint associated with UK food supply 1986–  
713 2011. *Global environmental change*, 43, 72-81.
- 714 van Soesbergen, A., Arnell, A. P., Sassen, M., Stuch, B., Schaldach, R., Göpel, J., ...  
715 Palazzo, A. (2017). Exploring future agricultural development and biodiversity in  
716 Uganda, Rwanda and Burundi: a spatially explicit scenario-based  
717 assessment. *Regional Environmental Change*, 17, 1409-1420.
- 718 Sparks, T. H., Butchart, S. H., Balmford, A., Bennun, L., Stanwell-Smith, D., Walpole, M., ...  
719 Collen, B. (2011). Linked indicator sets for addressing biodiversity loss. *Oryx*, 45, 411-  
720 419.

- 721 Strassburg, B. B., Brooks, T., Feltran-Barbieri, R., Iribarrem, A., Crouzeilles, R., Loyola, R.,  
722 ... Soares-Filho, B. (2017). Moment of truth for the Cerrado hotspot. *Nat. Ecol. Evol*, 1, 1-  
723 3.
- 724 The Ramsar Convention on Wetlands. Available: <http://www.ramsar.org/>. Accessed July  
725 2017
- 726 Thomas, C. D., Cameron, A., Green, R. E., Bakkenes, M., Beaumont, L. J., Collingham, Y.  
727 C., ... Hughes, L. (2004). Extinction risk from climate change. *Nature*, 427, 145.
- 728 United Nations Millennium Development Goals. Available:  
729 <http://www.un.org/millenniumgoals/>. Accessed July 2017.
- 730 United States Geological Survey. 2006 Shuttle Radar Topography Mission 3 arc second  
731 version 2.0. See <http://www.landcover.org/data/srtm> (accessed November 2016).
- 732 Veach, V., Di Minin, E., Pouzols, F. M., & Moilanen, A. (2017). Species richness as criterion  
733 for global conservation area placement leads to large losses in coverage of  
734 biodiversity. *Diversity and Distributions*, 23, 715-726.
- 735 Visconti, P., Pressey, R. L., Giorgini, D., Maiorano, L., Bakkenes, M., Boitani, L., ...  
736 Rondinini, C. (2011). Future hotspots of terrestrial mammal loss. *Philosophical*  
737 *Transactions of the Royal Society of London B: Biological Sciences*, 366, 2693-2702.
- 738 Visconti, P., Bakkenes, M., Baisero, D., Brooks, T., Butchart, S. H., Joppa, L.,... Maiorano, L.  
739 (2016). Projecting global biodiversity indicators under future development  
740 scenarios. *Conservation Letters*, 9, 5-13.
- 741 World Wildlife Fund, 2015. The Big Five of the Cerrado.  
742 <http://www.wwf.org.br/informacoes/english/?50242/The-Big-Five-of-the-Cerrado>,  
743 Accessed August 2016.

744

#### 745 **DATA ACCESSIBILITY**

746 All data used in this study are freely available online (Please see references for more  
747 details). Species ranges were obtained from: ([https://www.iucnredlist.org/resources/spatial-](https://www.iucnredlist.org/resources/spatial-data-download)  
748 [data-download](https://www.iucnredlist.org/resources/spatial-data-download) - Mammals & Amphibians), (<http://datazone.birdlife.org/species/requestdis> -  
749 Birds), and (<https://tinyurl.com/y7zxzxhv>- Plants). Habitat preferences for vertebrates,  
750 including altitudinal ranges, we obtained from (<http://apiv3.iucnredlist.org/api/v3/docs>). Land  
751 cover and boundary data for Brazil were obtained from (<https://www.lapig.iesa.ufg.br/lapig/>).  
752 Digital elevation data was obtained from ([https://lta.cr.usgs.gov/products\\_overview](https://lta.cr.usgs.gov/products_overview)). Soy  
753 expansion data were obtained from (Gibbs et al., 2015).

754

755
